# Supplementary material for: PANI–PEG copolymer modified LiFePO4as a cathode material for high-performance lithium ion batteries
Source: Royal Society of Chemistry journal article supplement (doi:10.1039/c4ta04089a), 2014-09-22
Supplement: c4ta04089a1.pdf [file c4ta04089a1.pdf]

## Supplementary Information

### PANI-PEG copolymer modified LiFePO<sub>4</sub> as a cathode material for high-performance lithium ion batteries

Chunli Gong,<sup>a,b,c</sup> Fangli Deng,<sup>a</sup> Chi-Pong Tsui,<sup>c</sup> Zhigang Xue,<sup>a,\*</sup> Yun Sheng Ye,<sup>a</sup> Chak-Yin Tang,<sup>c,\*</sup> Xingping Zhou<sup>a</sup> and Xiaolin Xie<sup>a</sup>

<sup>a</sup> Key Laboratory for Large-Format Battery Materials and Systems, Ministry of Education, School of Chemistry and Chemical Engineering, Huazhong University of Science and Technology, Wuhan 430074, China.

<sup>b</sup> College of Chemistry and Material Science, Hubei Engineering University, Xiaogan 432100, Hubei, China.

<sup>c</sup> Department of Industrial and Systems Engineering, The Hong Kong Polytechnic University, Hung Hom, Hong Kong, China.

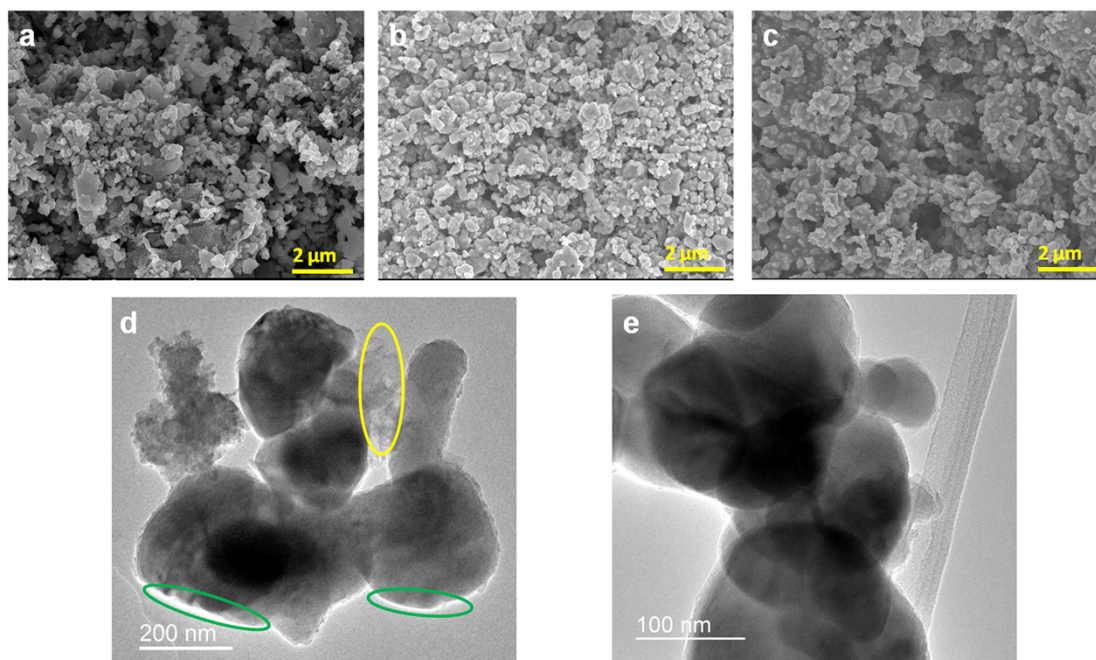

Fig. S1 SEM images of (a) cLFP, (b) cLFP/PANI and (c) cLFP/PANI-PEG, TEM images of (d) cLFP/PANI and (e) cLFP/PANI-PEG. The yellow ring in (d) represents dissociative polymer, and the green rings represent uncoated areas.

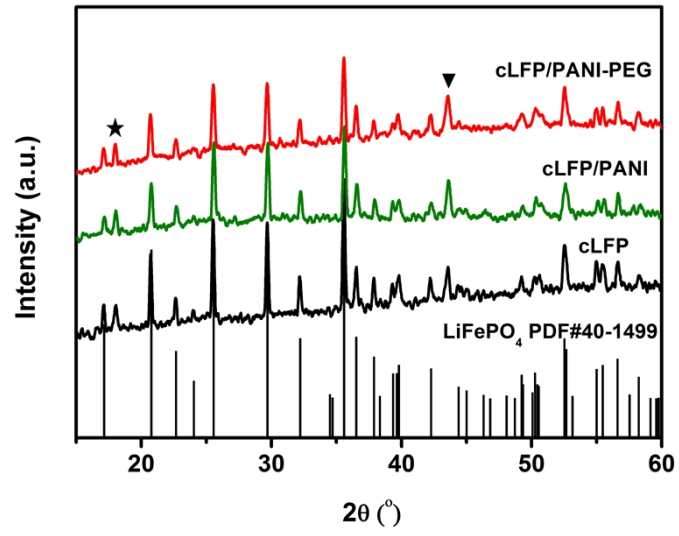

Fig. S2 XRD patterns of the cycled cLFP, cLFP/PANI and cLFP/PANI-PEG electrodes at 0.1C.
